# Supplementary material for: Important role of the position of a functional group in isomers for photophysical and antibacterial properties: a case study with naphthalenemaleonitrile positional isomers
Source: Royal Society of Chemistry journal article supplement (doi:10.1039/d0nj02891f), 2020-01-01
Supplement: d0nj02891f1.pdf [file d0nj02891f1.pdf]

## ESI of

# Important role of the position of a functional group in isomers for Photophysical and Antibacterial Properties: A case study with Naphthalenemaleonitrile Positional Isomers.

Monika<sup>a</sup>, Abhineet Verma,<sup>a</sup> Supriy Verma,<sup>a</sup> Nidhi Pandey<sup>b</sup>, Ragini Tilak<sup>b</sup> and Satyen Saha<sup>\*a</sup>

<sup>a</sup>Department of Chemistry, Institute of Science, Banaras Hindu University, Varanasi 221005, India.  
Email: satyen.saha@gmail.com.

<sup>b</sup>Department of Microbiology, Institute of Medical Science, Banaras Hindu University, Varanasi, 221005, India

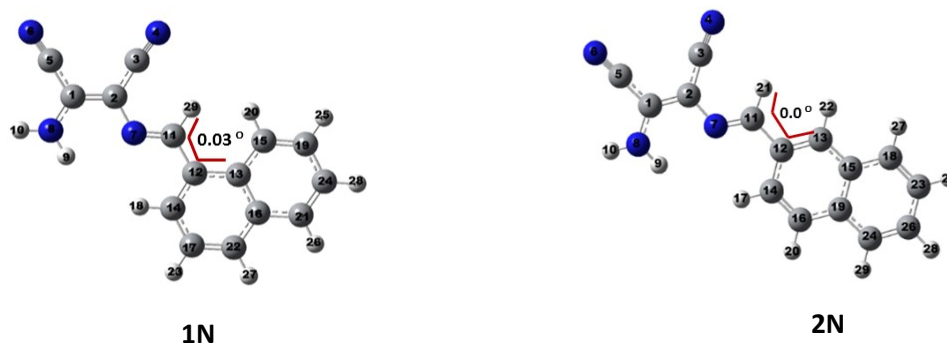

**Figure S1:** The optimization geometry of 1N with dihedral angle  $D_{H29-C11-C12-C13}$  (0.03 °) and 2N with dihedral angle  $D_{H21-C11-C12-C13}$  (0.0 °) showing the numbering scheme of atoms.

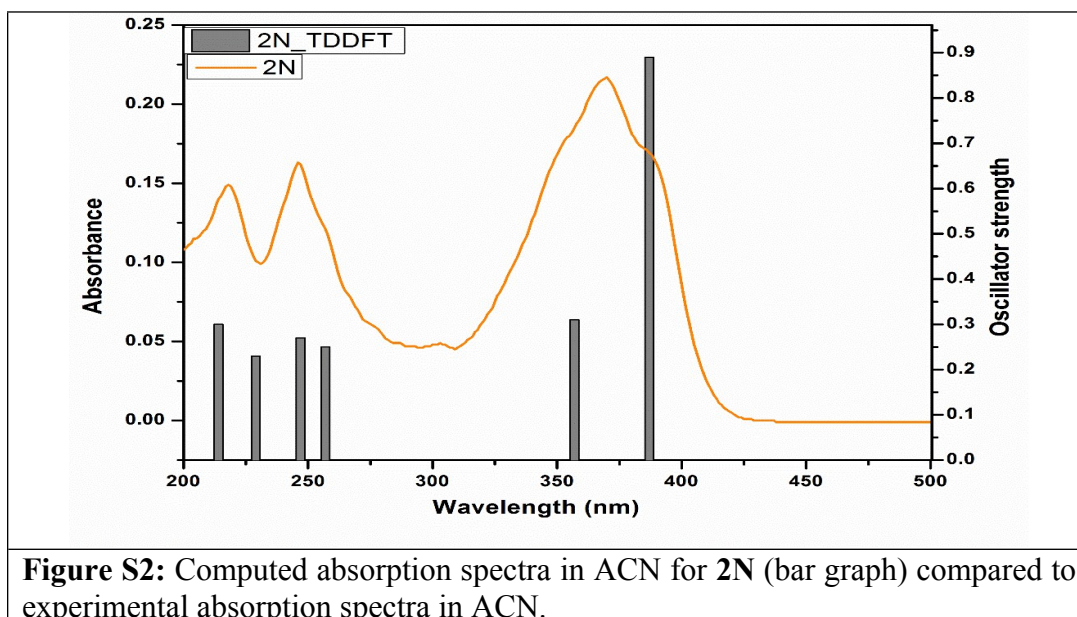

**Figure S2:** Computed absorption spectra in ACN for 2N (bar graph) compared to experimental absorption spectra in ACN.

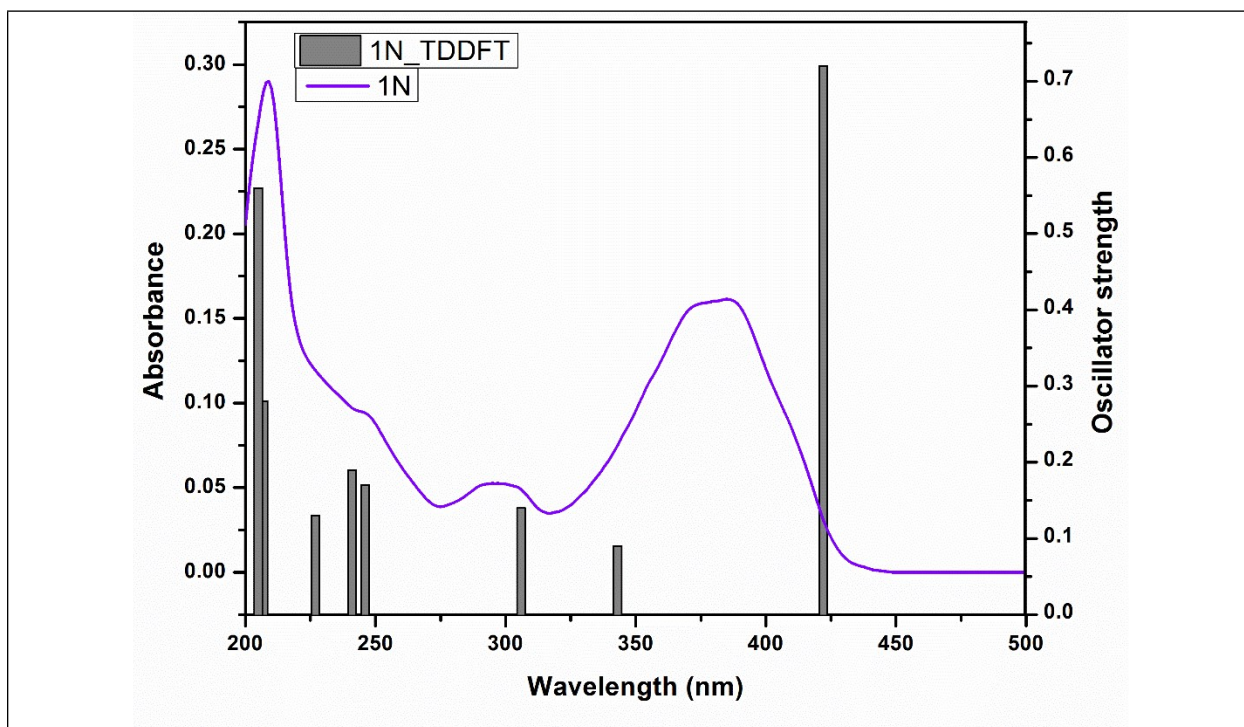

**Figure S3:** Computed absorption spectra in ACN for 1N (bar graph) compared to experimental absorption spectra in ACN.

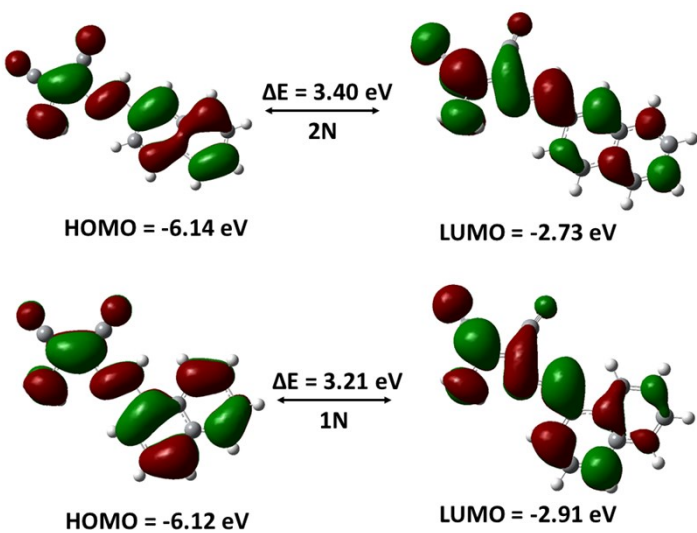

**Figure S4:** HOMO and LUMO energy level of 1N and 2N.

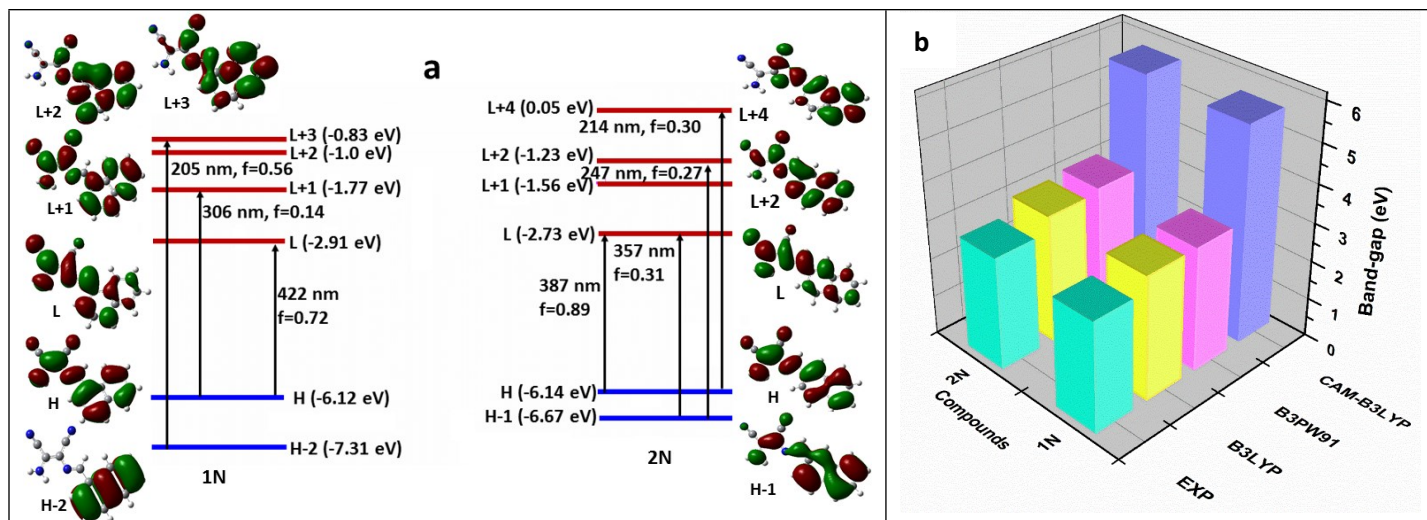

**Figure S5.** (a) Molecular orbitals of 1N and 2N involved in electronic transitions through TD-DFT calculations performed in ACN via CPCM model. (b) Showing the band gap through different level of theory.

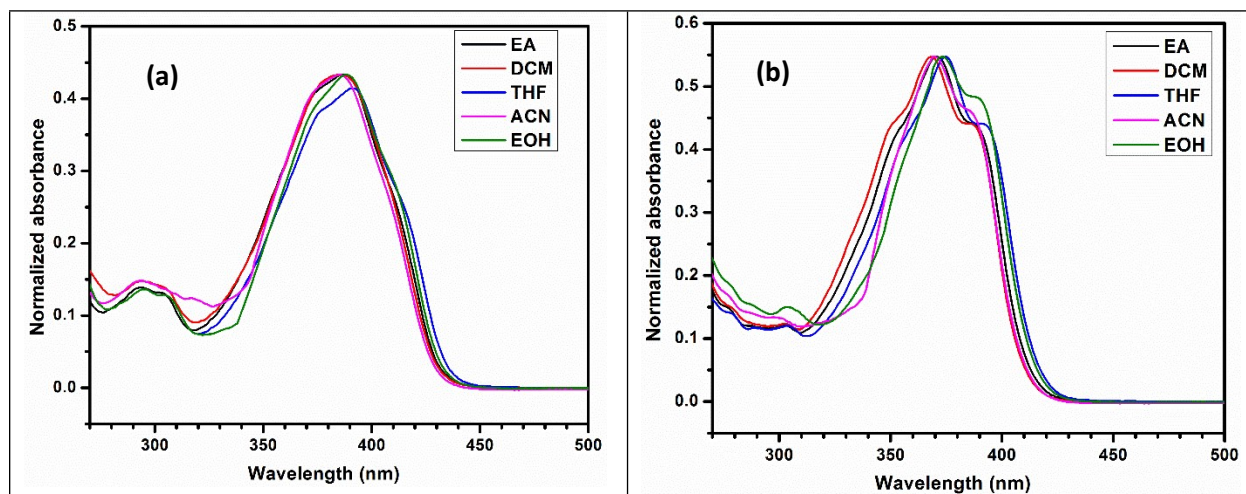

**Figure S6:** Normalized absorption spectra of (a) 1N and (b) 2N in different solvent at room temperature ( $10^{-5}$  mol/L concentration)

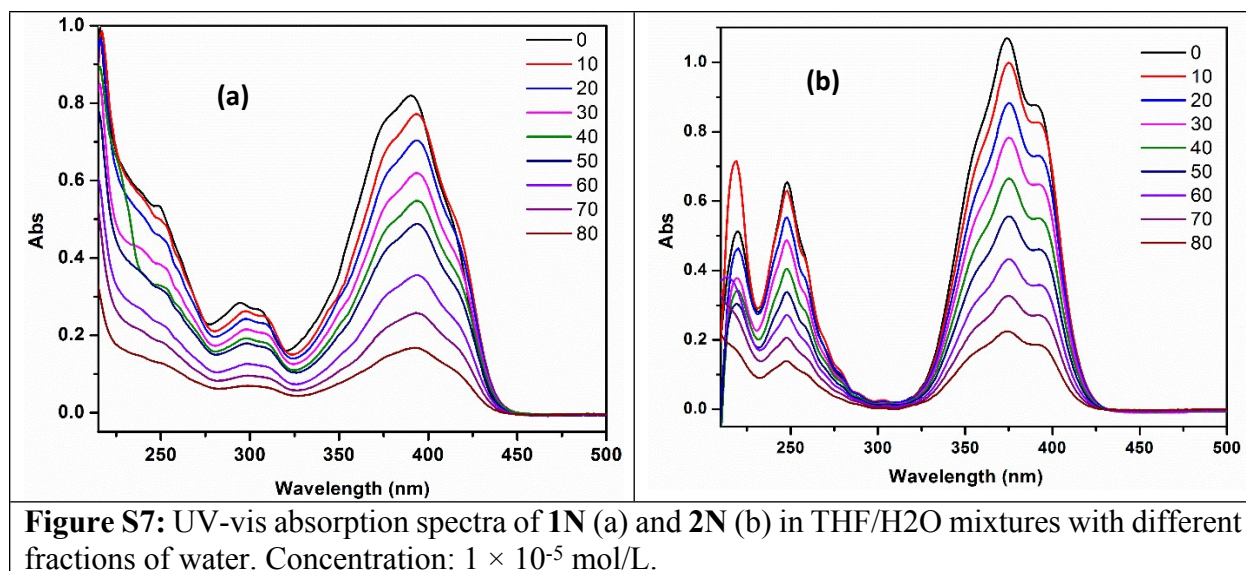

Cyclic voltammetry (CV) studies were carried out in millimolar solution of compound **1N** and **2N** in anhydrous acetonitrile.

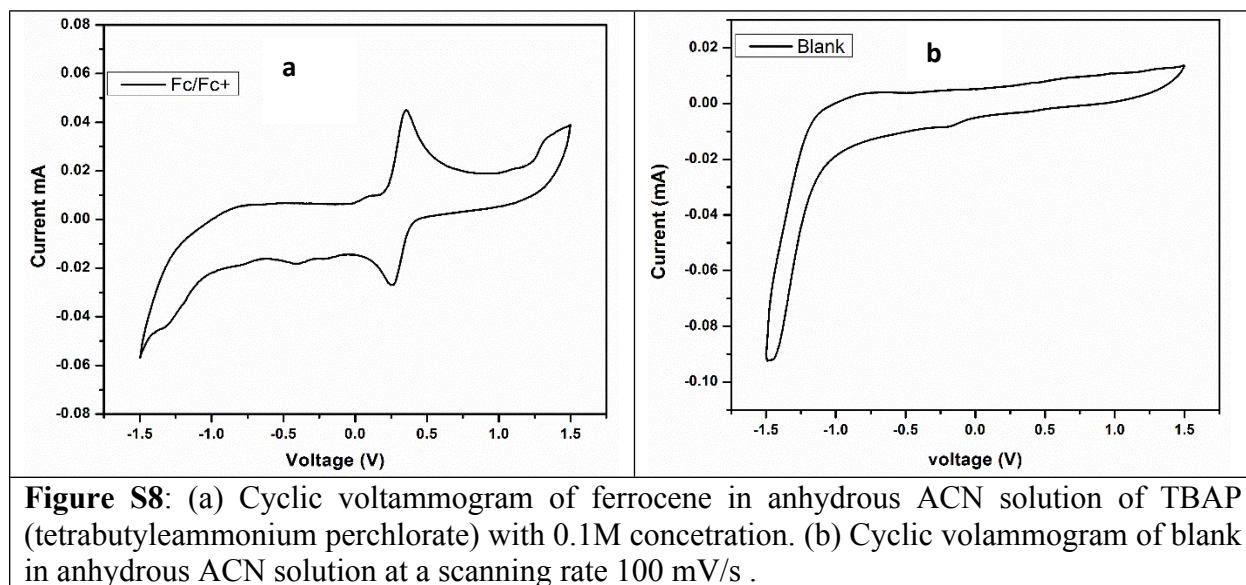

$E_{\text{red}}$  and  $E_{\text{oxd}}$  were found to be -0.684, -0.390 and 0.50, 0.864 V for **1N** and **2N** respectively. The half-wave potential of the ferrocene/ferrocenium ( $F_c/F_c^+$ ) redox couple was found to be 0.302 V by the following relation.

$$(E_{1/2, F_c/F_c^+}) = (E_{\text{anodic peak potential}} + E_{\text{cathodic peak potential}})/2 = (0.352 + 0.252)/2 = 0.302 \text{ V}$$

The band gap was calculated using the following relation:

$$E_{\text{HOMO}} = -(E_{\text{oxd,onset}} - E_{1/2, \text{Fc}^+/\text{Fc}} + 4.8) \text{eV}$$

$$E_{\text{LUMO}} = -(E_{\text{red,onset}} - E_{1/2, \text{Fc}^+/\text{Fc}} + 4.8) \text{eV}$$

$$\Delta E_{\text{g}} = E_{\text{HOMO}} - E_{\text{LUMO}}$$
